# Supplementary material for: A simple one-step solution deposition process for constructing high-performance amorphous zirconium oxide thin film
Source: Royal Society of Chemistry journal article supplement (doi:10.1039/c3ra46169f), 2013-12-05
Supplement: c3ra46169f.pdf [file c3ra46169f.pdf]

## **A simple one-step solution deposition process for constructing high-performance amorphous zirconium oxide thin film**

Yongjuan Mi,<sup>ab</sup> Jinqing Wang,<sup>\*a</sup> Zhigang Yang,<sup>a</sup> Zhaofeng Wang,<sup>a</sup>

Honggang Wang,<sup>a\*</sup> and Shengrong Yang<sup>a</sup>

<sup>a</sup>State Key Laboratory of Solid Lubrication, Lanzhou Institute of Chemical Physics,  
Chinese Academy of Sciences, Lanzhou, 730000, P. R. China.

<sup>b</sup>University of Chinese Academy of Sciences, Beijing, 100080, P. R. China

E-mail: jqwang@licp.cas.cn, hgwang@licp.cas.cn;

Fax: +86-931-8277088; Tel: +86-931-4968076

### **Supplementary Information**

#### 2.2.1. Silicon surface preparation

N-type (100) single-crystal silicon wafers, polished on one side, were used as substrates. The silicon wafers were immersed in Piranha solution (a mixture of 98% H<sub>2</sub>SO<sub>4</sub> and 30% H<sub>2</sub>O<sub>2</sub> with a volume ratio of 7:3) at 90 °C for 30 min. Then they were thoroughly rinsed with ultrapure water and dried under N<sub>2</sub> flow. These freshly treated wafers were used for the following deposition of self-assembled monolayer (SAM).

#### 2.2.2. Construction of SAM

In order to increase the bonding strength of PDA with substrate, the pretreated silicon substrates were subsequently put into a 5 mM APTS solution in a mixture solution of acetone and water (the volume ratio of acetone to water was 5:1) and kept for 30 min. Then the wafers were taken out and ultrasonically cleaned in acetone and water, respectively, to remove the physically absorbed deposits, followed by blowing dry with N<sub>2</sub>, generating the APTS-SAM modified silicon substrates. Subsequently, the APTS-SAM modified silicon substrates were immersed into the Tris-HCl (pH 8.5) solution of DA and kept for 6 h under stirring, then removed and ultrasonically cleaned in water followed by drying under N<sub>2</sub> blow. For convenience, the obtained sample was coded as Si-APTS-PDA.

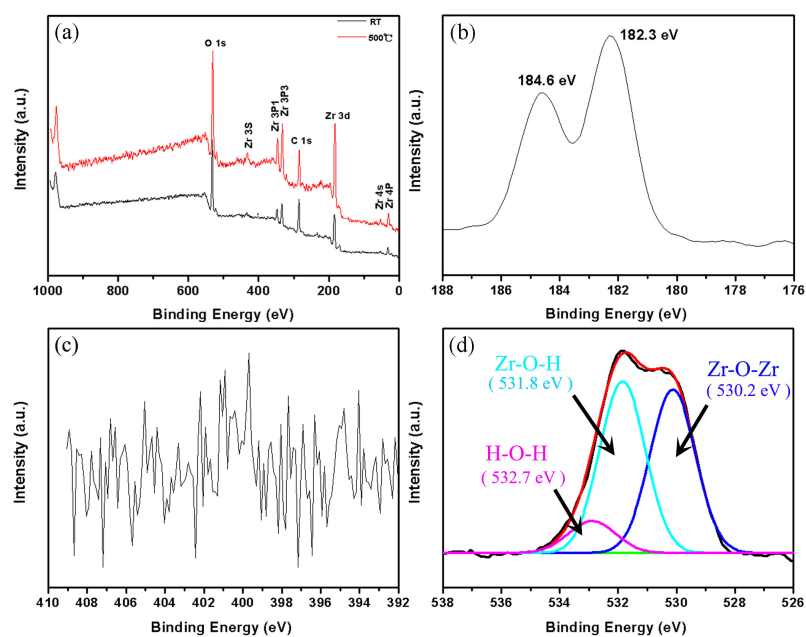

Fig. S1 XPS spectrum of the annealed ZrO<sub>2</sub> nanocomposite film at 500 °C: (a) XPS survey spectrum; (b) XPS spectrum of Zr 3d; (c) XPS spectrum of N 1s; (d) deconvolution result of XPS O 1s core-level spectra.

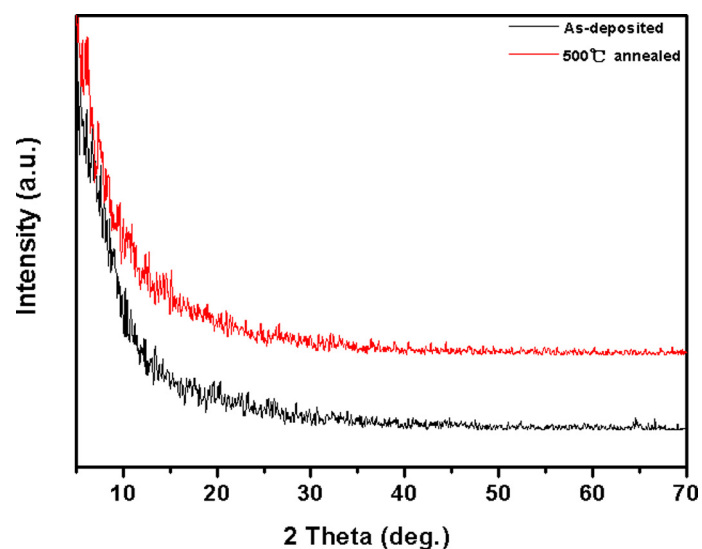

Fig. S2 GIAXRD patterns of the as-prepared  $\text{ZrO}_2$  homogenous film and the film annealed at 500 °C for 1h.

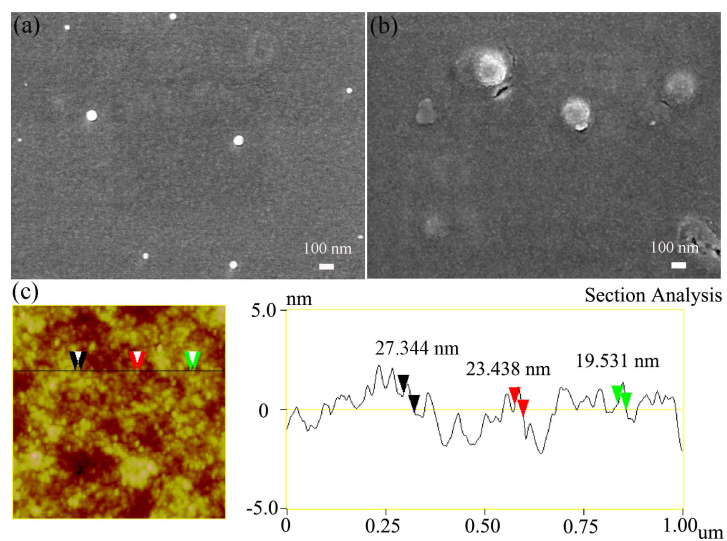

Fig. S3 (a) FE-SEM image of the 500 °C annealed  $\text{ZrO}_2$  nanocomposite film; (b) FE-SEM image of 500 °C annealed homogeneous  $\text{ZrO}_2$  film; (c) AFM morphology of the 500 °C annealed  $\text{ZrO}_2$  nanocomposite film with a scanning area of 1  $\mu\text{m} \times 1 \mu\text{m}$  and the corresponding section analysis.

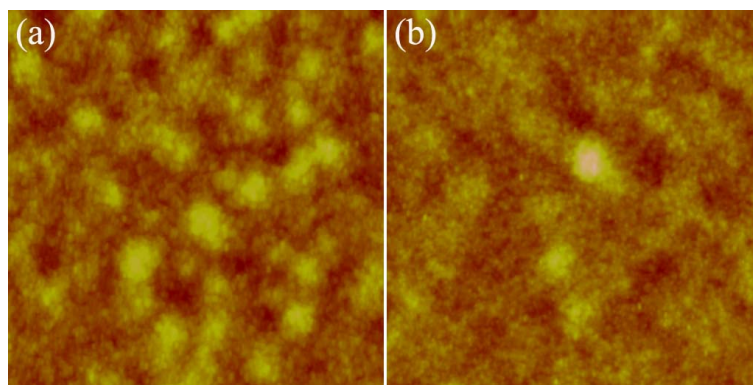

Fig. S4 AFM morphology of (a) the as-deposited and (b) the 500 °C annealed ZrO<sub>2</sub> nanocomposite film with a scanning area of 5 μm × 5 μm and the Z range of 50 nm.

Table S1 Hardness and reduced modulus of homogenous ZrO<sub>2</sub> thin film at an indentation depth of 30 nm.

| Samples         | H (GPa) | Er (GPa) |
|-----------------|---------|----------|
| As-deposited    | 1.416   | 19.084   |
| 500 °C annealed | 15.874  | 186.828  |

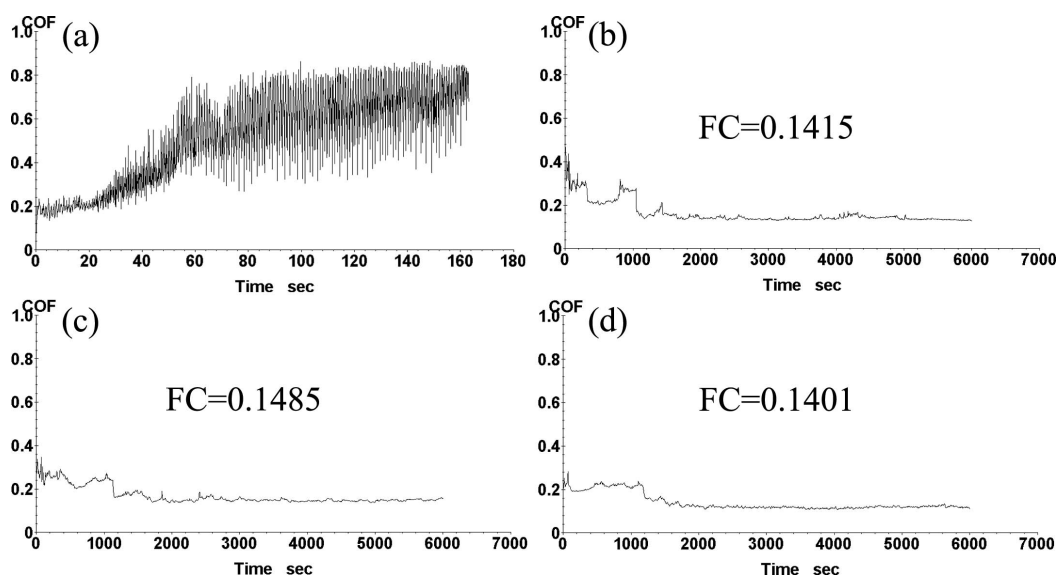

Fig. S5 Variation in friction coefficient (FC) with time for various film samples under different applied loads and a fixed sliding frequency of 1 Hz: the 500 °C annealed homogenous  $ZrO_2$  at the load of 0.1 N (a); the 500 °C annealed  $ZrO_2$  nanocomposite film under the loads of 0.3 N (b), 0.5 N (c), and 1.0 N (d). The stable friction coefficient was given above the corresponding curve.

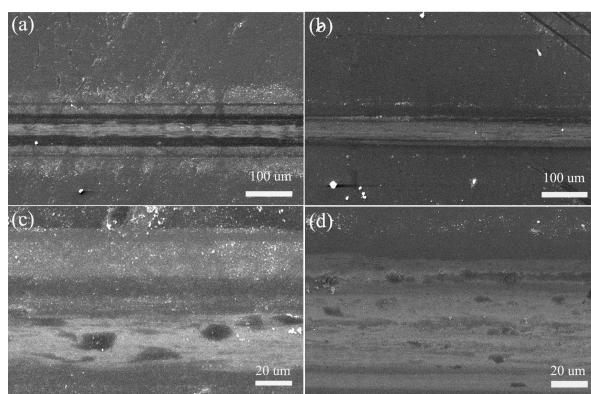

Fig. S6 SEM micrographs of the worn surfaces for homogeneous  $ZrO_2$  thin films sliding against steel ball under the applied load of 0.1N and a fixed sliding frequency of 1 Hz: the as-deposited homogeneous  $ZrO_2$  thin film (a) and (c), and 500 °C annealed homogeneous  $ZrO_2$  thin film (b) and (d).
